# Supplementary material for: Mapping CRISPR spaceromes reveals vast host-specific viromes of prokaryotes
Source: PubMed Central journal article supplement (PMC7308287; doi:10.1038/s42003-020-1014-1), 2020-06-22

### Supplementary figure 1

1000-fold bootstrap resampling of the set of spacers from figure 2b (all completely sequenced genomes) and figure 2c (154 genomes with spacers matches in viruses). Lines represent original values: blue, real spacers matching viral genomes; dark blue, mock spacers matching viral genomes; red, real spacers matching the host genome; dark red, mock spacers matching the host genome. Box plots represent results of bootstrapping of these values.

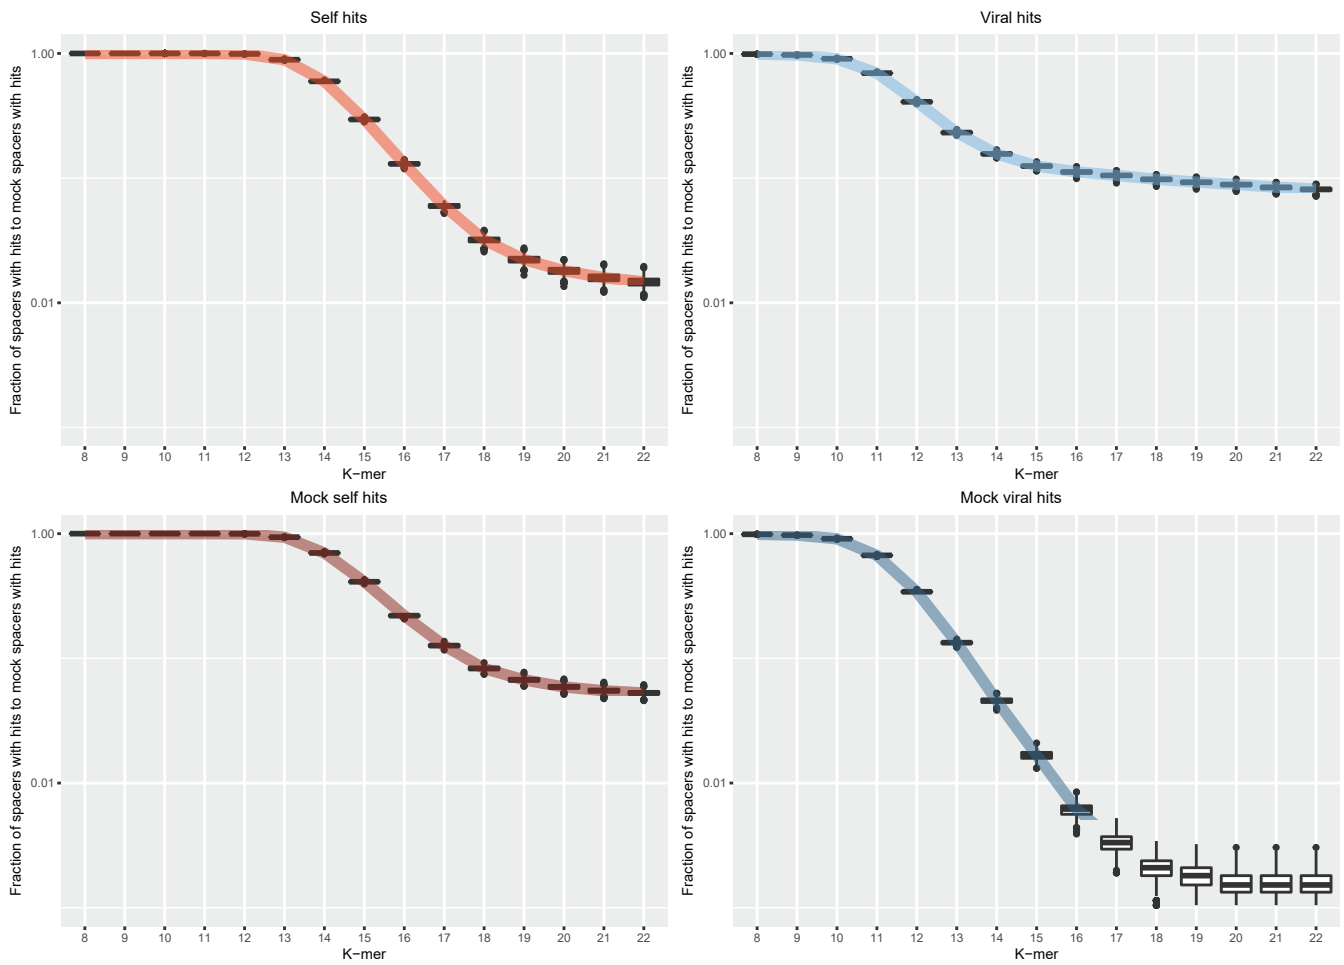

### Bootstrap for values shown on figure 2b (all completely sequenced genomes)

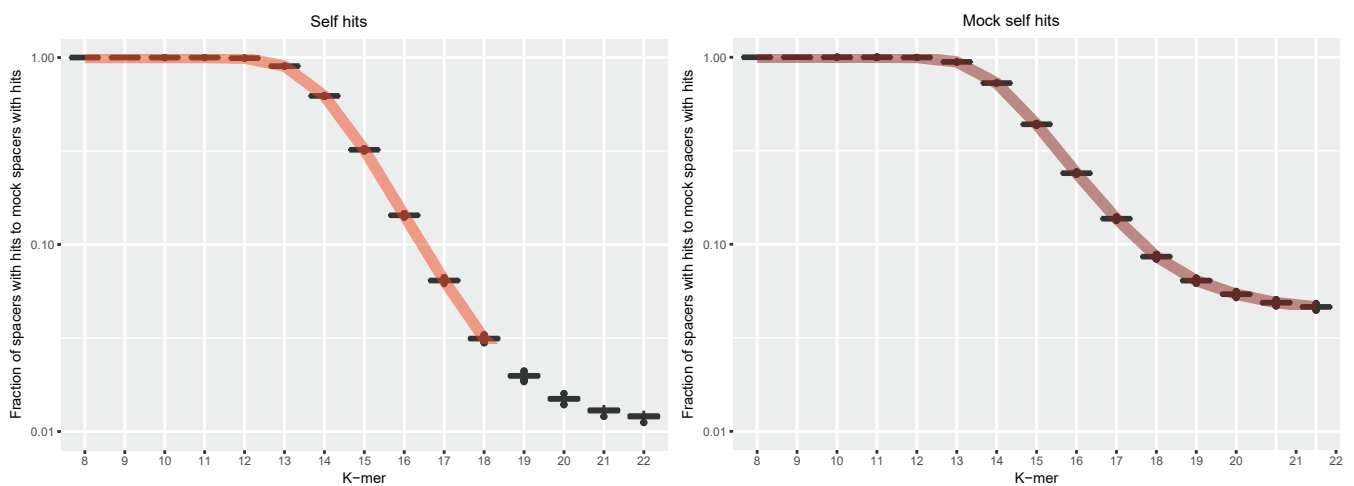

## Supplementary figure 2

Fractions of virus-matching and self-matching spacers (of the total number of spacers) for the scrambled spacers set for 154 genomes containing CRISPRs with identifiable protospacers in viruses. Line colors: blue, real spacers matching viral genomes; dark blue, mock spacers matching viral genomes; red, real spacers matching the host genome; dark red, mock spacers matching the host genome.

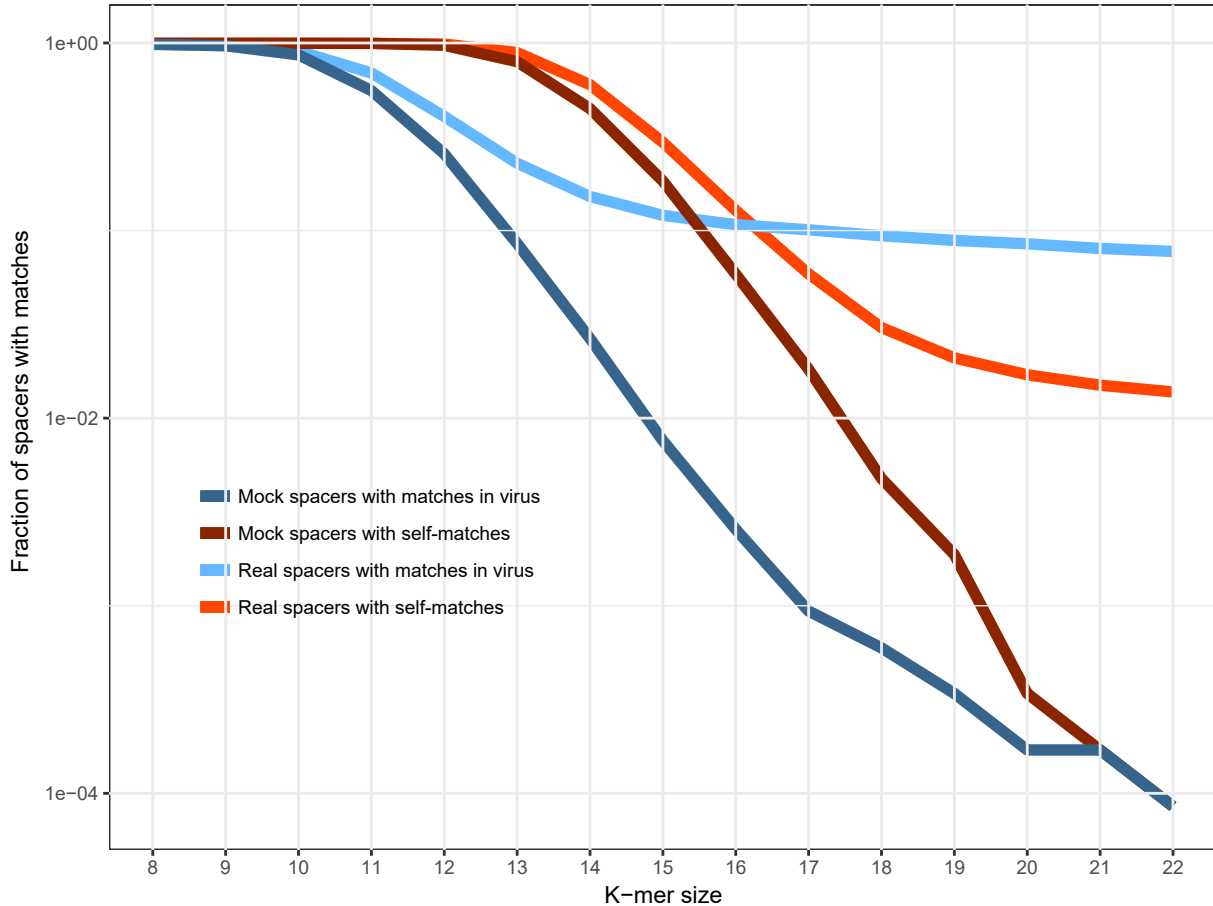

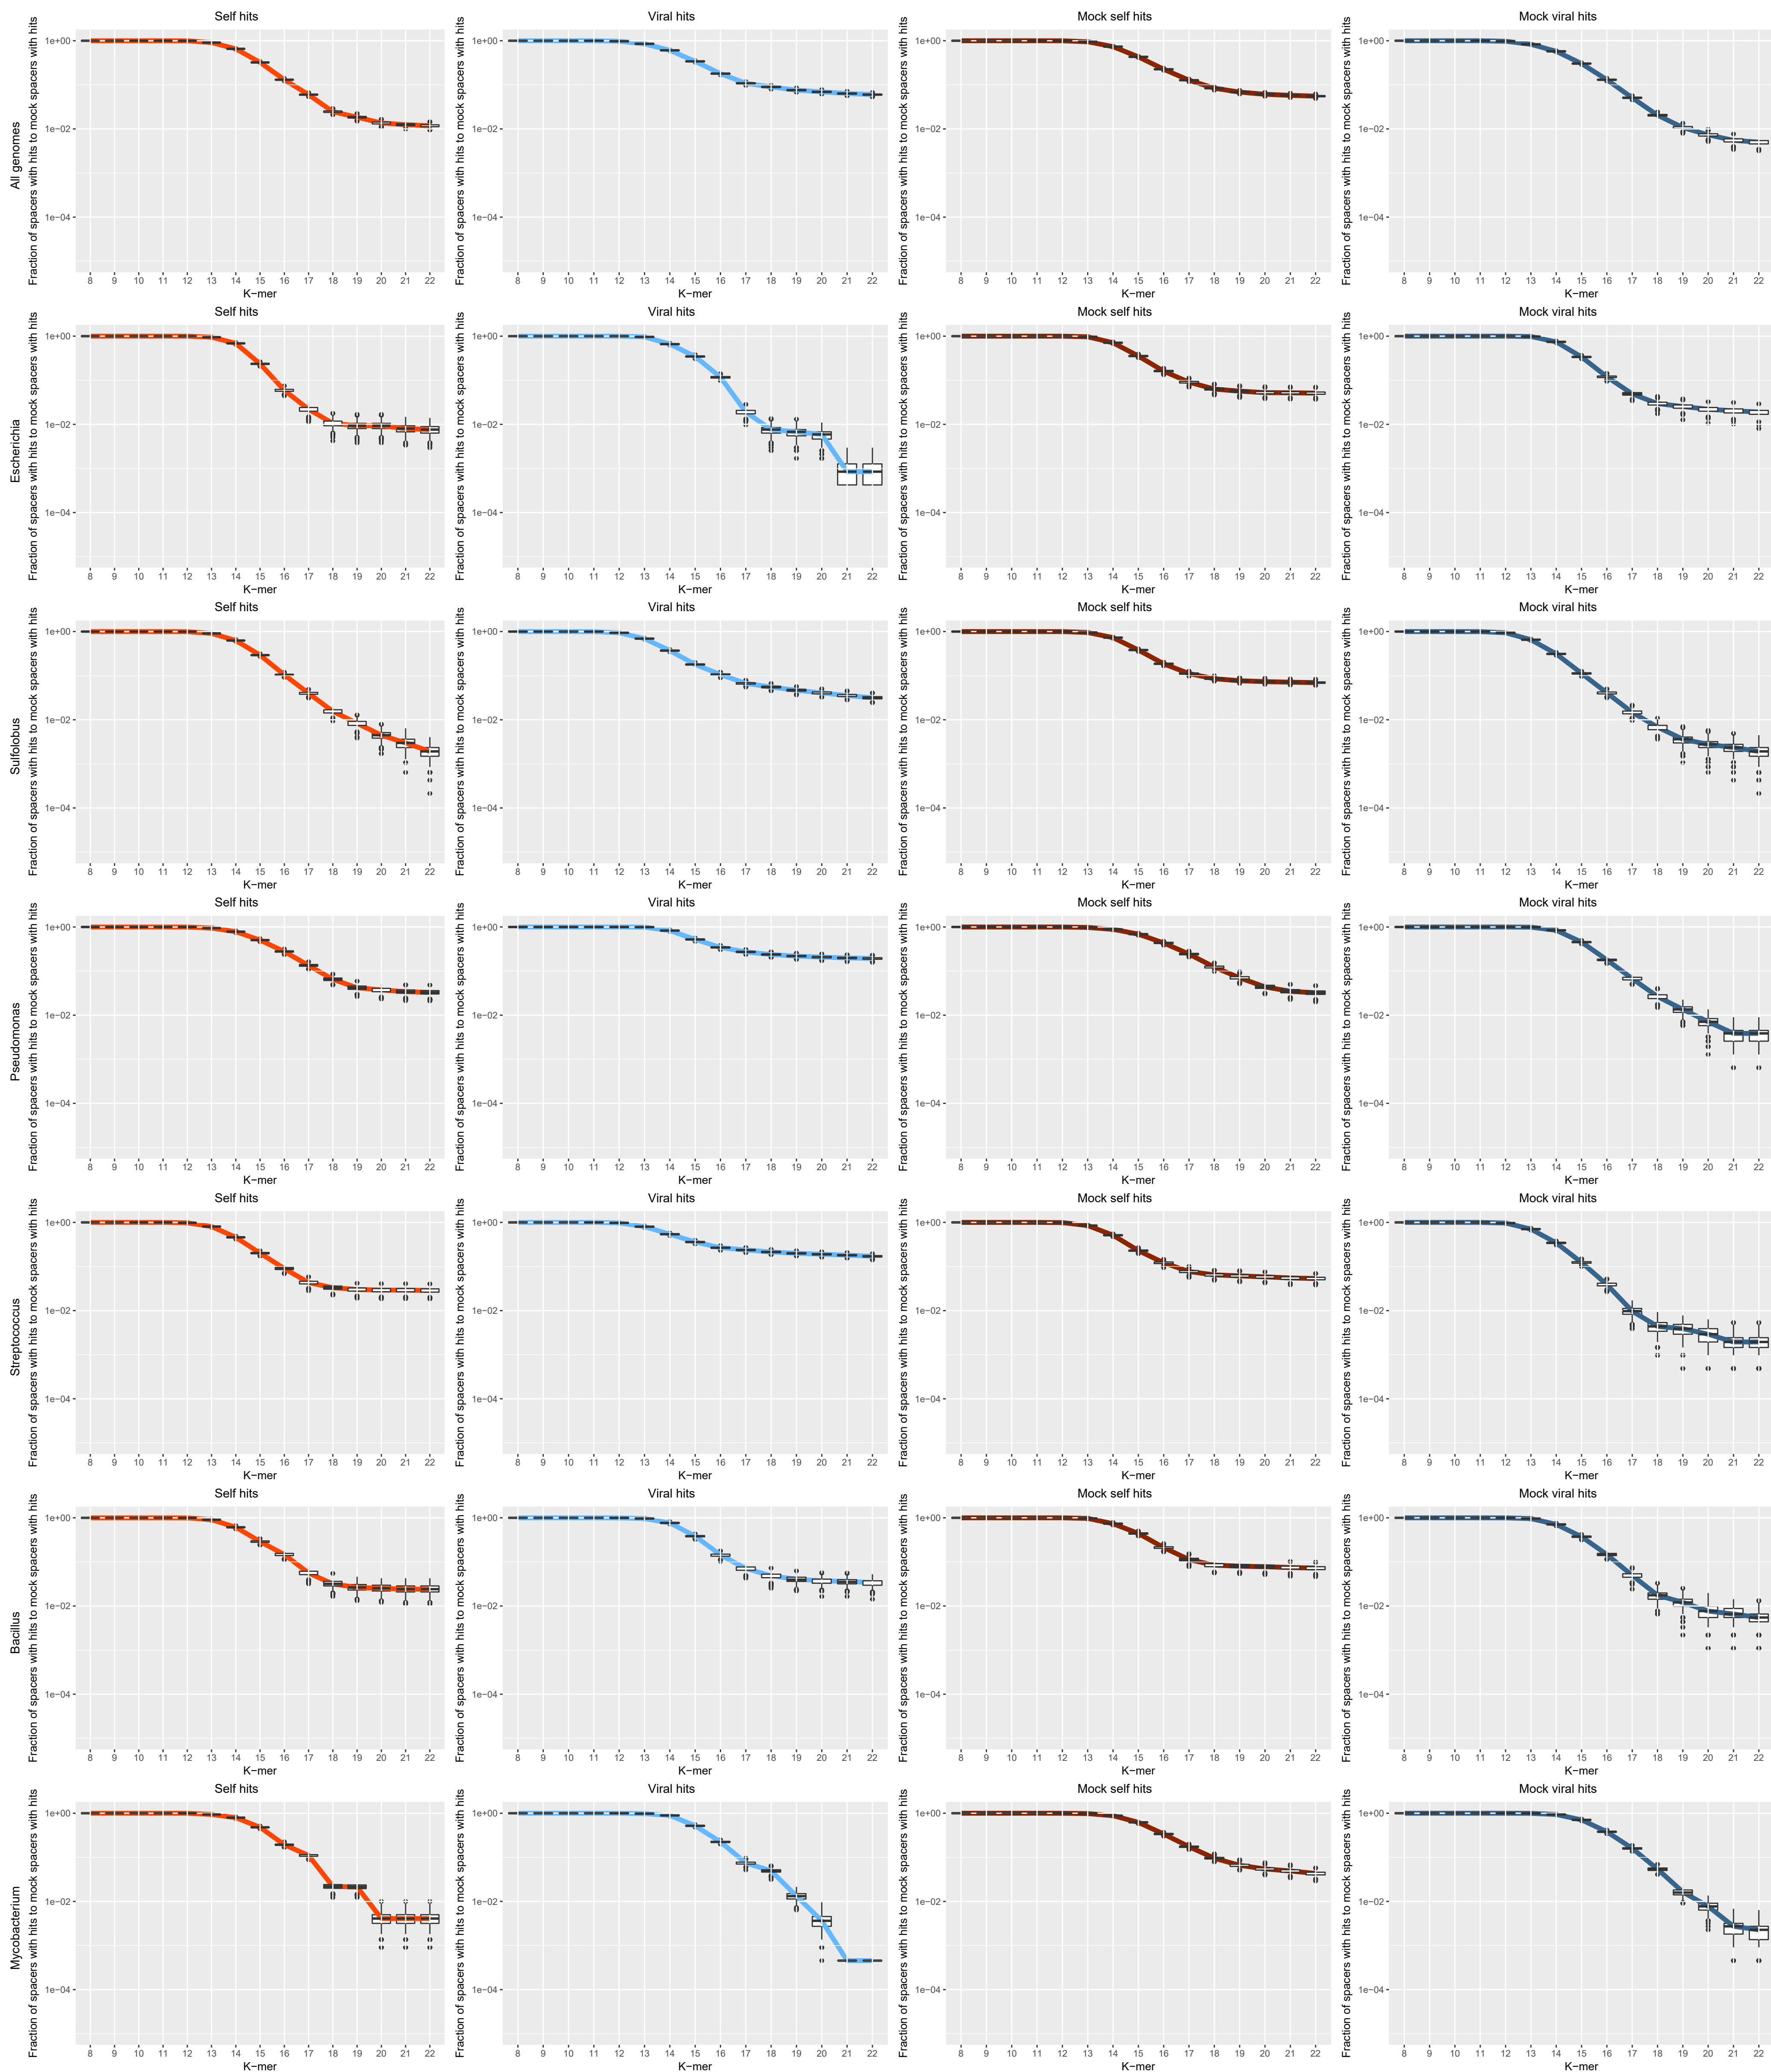

## Supplementary figure 4

1000-fold bootstrap resampling of the set of spacers from figure 4  
(data from adaptation experiments).

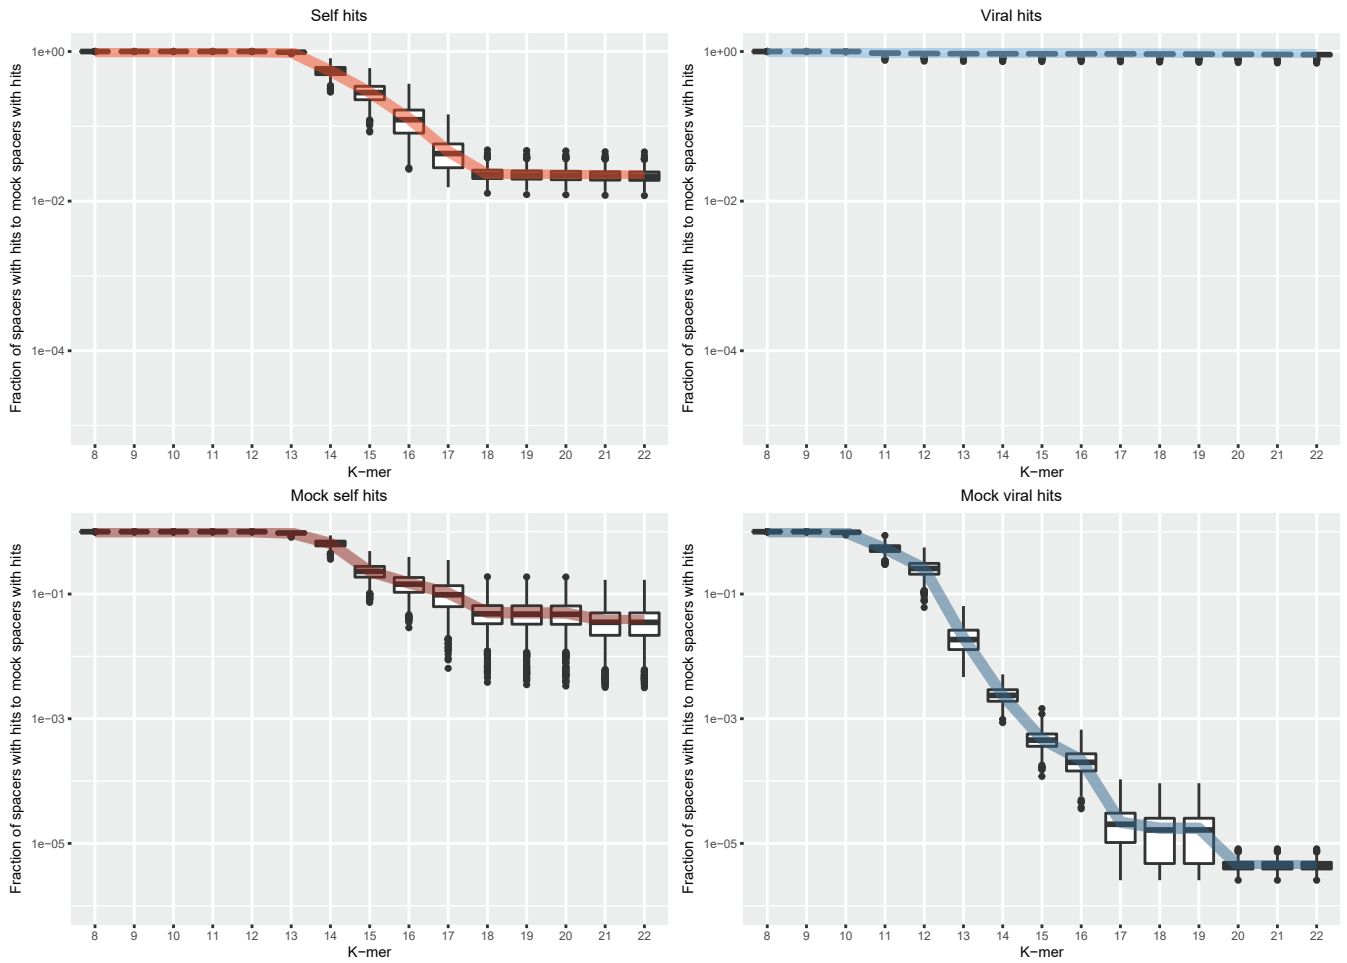

## Bootstrap for values shown on figure 4 for lambda phage

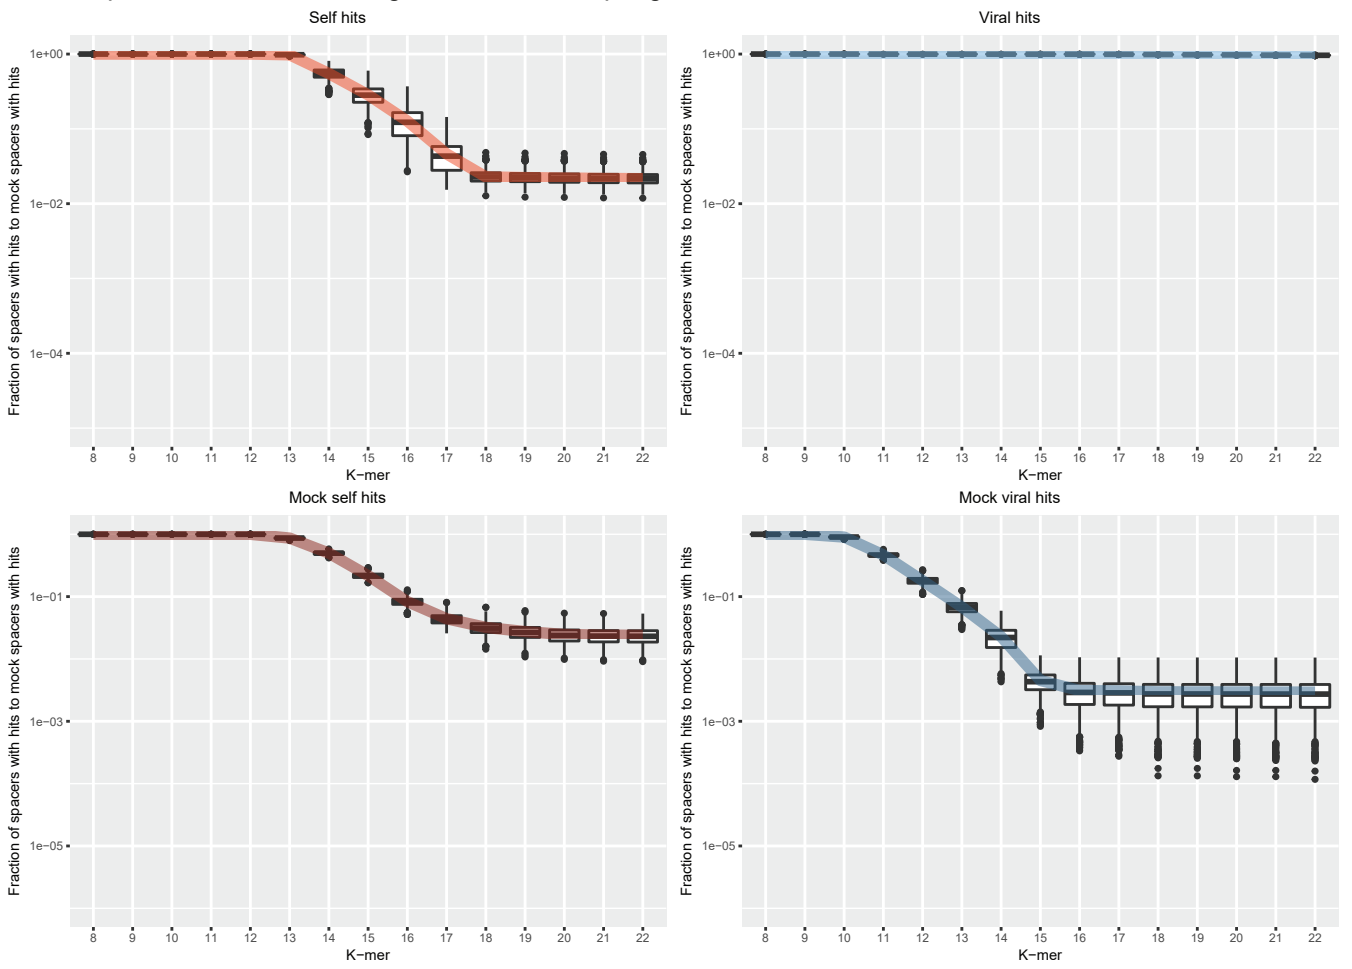

Supplement: 42003_2020_1014_MOESM1_ESM.pdf [file 42003_2020_1014_MOESM1_ESM.pdf]
