# Supplementary material for: Mapping CRISPR spaceromes reveals vast host-specific viromes of prokaryotes
Source: PubMed Central journal article supplement (PMC7308287; doi:10.1038/s42003-020-1014-1), 2020-06-22
Supplement: 42003_2020_1014_MOESM2_ESM.pdf [file 42003_2020_1014_MOESM2_ESM.pdf]

## **Description of Additional Supplementary Files**

File Name: Supplementary Data 1

Description: Coordinates for matches and possible annotation for all mock spacers with  $\geq 5$  matches in self genome.

File Name: Supplementary Data 2

Description: Characteristics of self-matching spacers in genomes containing  $\geq 5$  self-matches.

File Name: Supplementary Data 3

Description: Coordinates for matches and possible annotation for all 22-mers from mock spacers with matches in viral genomes

File Name: Supplementary Data 4

Description: Numbers of different PAMs for protospacers found in in adaptation experiments for self and viral matches.
